# Supplementary material for: Locating the hydrogen atoms in endohedral clusterfullerenes by density functional theory
Source: Royal Society of Chemistry journal article supplement (doi:10.1039/d2cp05050a), 2022-12-19
Supplement: d2cp05050a1.pdf [file d2cp05050a1.pdf]

## Electronic supplementary information

### Locating the hydrogen atoms in endohedral clusterfullerenes by density functional theory

Bo Li, Lei Lou and Peng Jin\*

School of Materials Science and Engineering, Hebei University of Technology,  
Tianjin 300130, China.

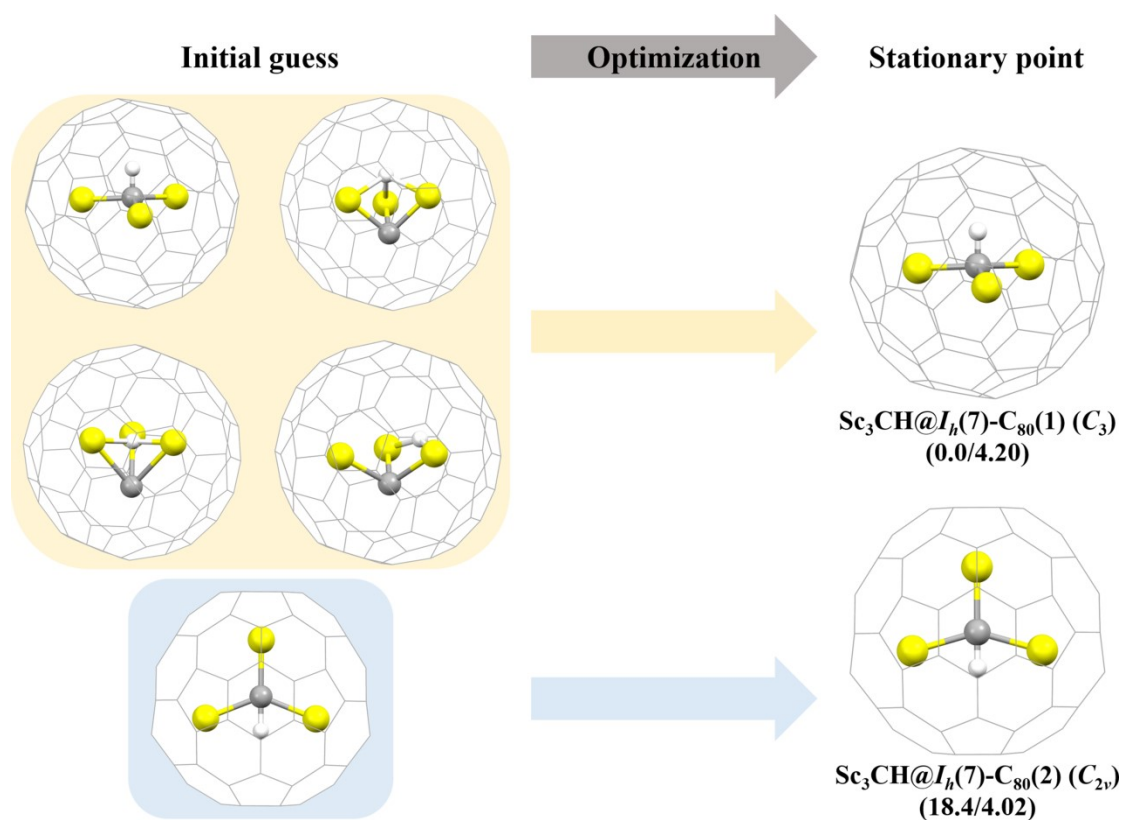

**Fig. S1** Initial guessed isomer structures and respective optimized results of  $\text{Sc}_3\text{CH}@I_h(7)\text{-C}_{80}$ . The point-group symmetries and relative energies (kcal/mol)/HOMO-LUMO gap energies (eV) are given in parentheses.

**Table S1** Relative energies (kcal/mol)/SOMO-LUMO gaps (eV) of two  $\text{Sc}_4\text{C}_2\text{H}@I_h(7)\text{-C}_{80}$  isomers obtained using different functionals and basis sets (C/H).

| isomer                                                  | basis sets | M06-2X    | B3LYP    | $\omega$ B97X-D |
|---------------------------------------------------------|------------|-----------|----------|-----------------|
| $\text{Sc}_4\text{C}_2\text{H}@I_h(7)\text{-C}_{80}(1)$ | 6-31G*     | 0.0/3.57  | 0.0/1.82 | 0.0/5.12        |
|                                                         | 6-311+G**  | 0.0/3.53  | 0.0/1.83 | 0.0/5.10        |
| $\text{Sc}_4\text{C}_2\text{H}@I_h(7)\text{-C}_{80}(2)$ | 6-31G*     | 12.6/2.36 | 1.6/0.87 | 5.0/3.84        |
|                                                         | 6-         | 11.7/2.43 | 0.1/1.10 | 3.1/3.87        |

**Table S2** Natural population analysis (NPA) charges and natural electron configuration populations of HCFs at the B3LYP/6-31G\*~SDD level of theory. Please see Fig. 2 in main text for the atom numbering.

| compound                                                | atom | charge | population                                      |
|---------------------------------------------------------|------|--------|-------------------------------------------------|
| $\text{Sc}_3\text{CH}@I_h(7)\text{-C}_{80}$             | Sc1  | +1.56  | $4s^{0.10}3d^{0.57}4p^{0.08}4d^{0.41}5p^{0.30}$ |
|                                                         | Sc2  | +1.56  | $4s^{0.10}3d^{0.57}4p^{0.08}4d^{0.41}5p^{0.30}$ |
|                                                         | Sc3  | +1.56  | $4s^{0.10}3d^{0.57}4p^{0.08}4d^{0.41}5p^{0.30}$ |
|                                                         | C    | -1.89  | $2s^{1.40}2p^{4.48}3p^{0.01}$                   |
|                                                         | H    | +0.29  | $1s^{0.71}$                                     |
| $\text{Sc}_4\text{CNH}@I_h(7)\text{-C}_{80}$            | Sc1  | +1.47  | $4s^{0.13}3d^{0.68}4d^{0.36}5p^{0.41}$          |
|                                                         | Sc2  | +1.37  | $4s^{0.15}3d^{0.66}4d^{0.42}5p^{0.46}$          |
|                                                         | Sc3  | +1.35  | $4s^{0.15}3d^{0.67}4d^{0.43}5p^{0.47}$          |
|                                                         | Sc4  | +1.20  | $4s^{0.16}3d^{0.91}4d^{0.27}5p^{0.54}$          |
|                                                         | C    | -1.21  | $2s^{1.22}2p^{3.90}3p^{0.02}$                   |
|                                                         | N    | -1.14  | $2s^{1.48}2p^{4.70}3p^{0.01}$                   |
| $\text{Sc}_4\text{C}_2\text{H}@I_h(7)\text{-C}_{80}(1)$ | Sc1  | +1.20  | $4s^{0.17}3d^{0.69}4p^{0.57}4d^{0.41}$          |
|                                                         | Sc2  | +1.21  | $4s^{0.18}3d^{0.74}4p^{0.55}4d^{0.40}$          |
|                                                         | Sc3  | +1.09  | $4s^{0.17}3d^{0.88}4p^{0.59}4d^{0.33}$          |
|                                                         | Sc4  | +1.18  | $4s^{0.18}3d^{0.74}4p^{0.55}4d^{0.42}$          |
|                                                         | C1   | -0.86  | $2s^{1.18}2p^{3.65}3p^{0.03}$                   |
|                                                         | C2   | -0.89  | $2s^{1.18}2p^{3.67}3p^{0.02}$                   |
|                                                         | H    | -0.35  | $1s^{1.35}$                                     |
| $\text{Sc}_4\text{C}_2\text{H}@I_h(7)\text{-C}_{80}(2)$ | Sc1  | +1.43  | $4s^{0.13}3d^{0.65}4p^{0.42}4d^{0.41}$          |
|                                                         | Sc2  | +1.37  | $4s^{0.13}3d^{0.69}4p^{0.44}4d^{0.43}$          |
|                                                         | Sc3  | +1.45  | $4s^{0.12}3d^{0.66}4p^{0.40}4d^{0.41}$          |
|                                                         | Sc4  | +1.34  | $4s^{0.14}3d^{0.74}4p^{0.50}4d^{0.35}$          |
|                                                         | C1   | -1.23  | $2s^{1.12}2p^{4.08}3p^{0.03}$                   |
|                                                         | C2   | -1.45  | $2s^{1.21}2p^{4.23}3p^{0.01}$                   |
|                                                         | H    | +0.28  | $1s^{0.72}$                                     |

**Table S3** Vertical ionization potential (VIP), vertical electron affinity (VEA), adiabatic ionization potential (AIP) and adiabatic electron affinity (AEA) of  $\text{Sc}_3\text{CH}@I_h(7)\text{-C}_{80}$ ,  $\text{Sc}_4\text{CNH}@I_h(7)\text{-C}_{80}$  and two  $\text{Sc}_4\text{C}_2\text{H}@I_h(7)\text{-C}_{80}$  isomers obtained using different functionals (unit: eV).

| compound                                     | functionals | VIP | VEA | AIP | AEA |
|----------------------------------------------|-------------|-----|-----|-----|-----|
| $\text{Sc}_3\text{CH}@I_h(7)\text{-C}_{80}$  | M06-2X      | 7.1 | 1.8 | 7.0 | 2.3 |
|                                              | B3LYP       | 7.0 | 1.8 | 6.6 | 1.9 |
| $\text{Sc}_4\text{CNH}@I_h(7)\text{-C}_{80}$ | M06-2X      | 6.3 | 1.7 | 5.9 | 1.9 |
|                                              | B3LYP       | 5.1 | 1.9 | 4.9 | 2.0 |

|                                                         |        |     |     |     |     |
|---------------------------------------------------------|--------|-----|-----|-----|-----|
| $\text{Sc}_4\text{C}_2\text{H}@I_h(7)\text{-C}_{80}(1)$ | M06-2X | 6.6 | 1.9 | 6.6 | 2.0 |
|                                                         | B3LYP  | 6.6 | 1.9 | 6.4 | 1.9 |
| $\text{Sc}_4\text{C}_2\text{H}@I_h(7)\text{-C}_{80}(2)$ | M06-2X | 5.8 | 1.9 | 5.3 | 2.1 |
|                                                         | B3LYP  | 5.0 | 2.0 | 4.9 | 2.1 |

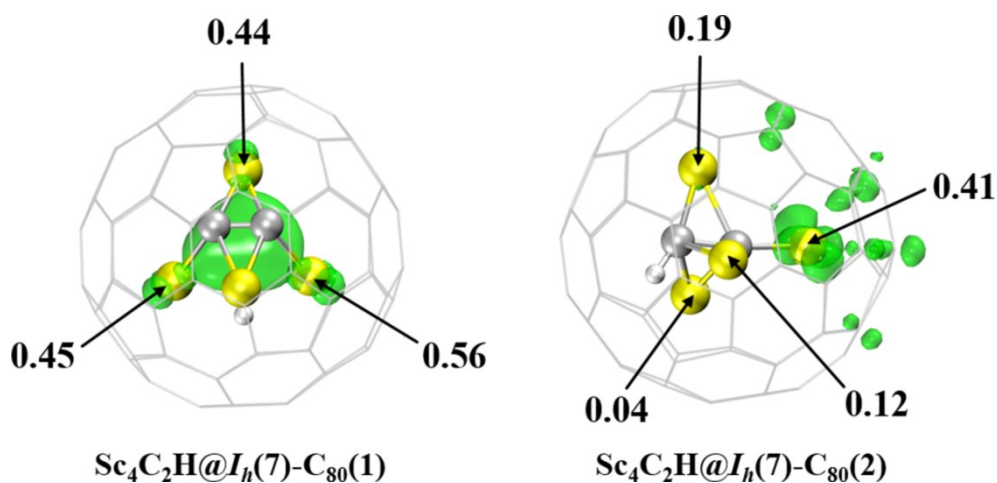

**Fig. S2** Spin density distribution (with spin population values for selected atoms) of two  $\text{Sc}_4\text{C}_2\text{H}@I_h\text{-C}_{80}$  isomers (isovalue:  $\pm 0.006$  au).

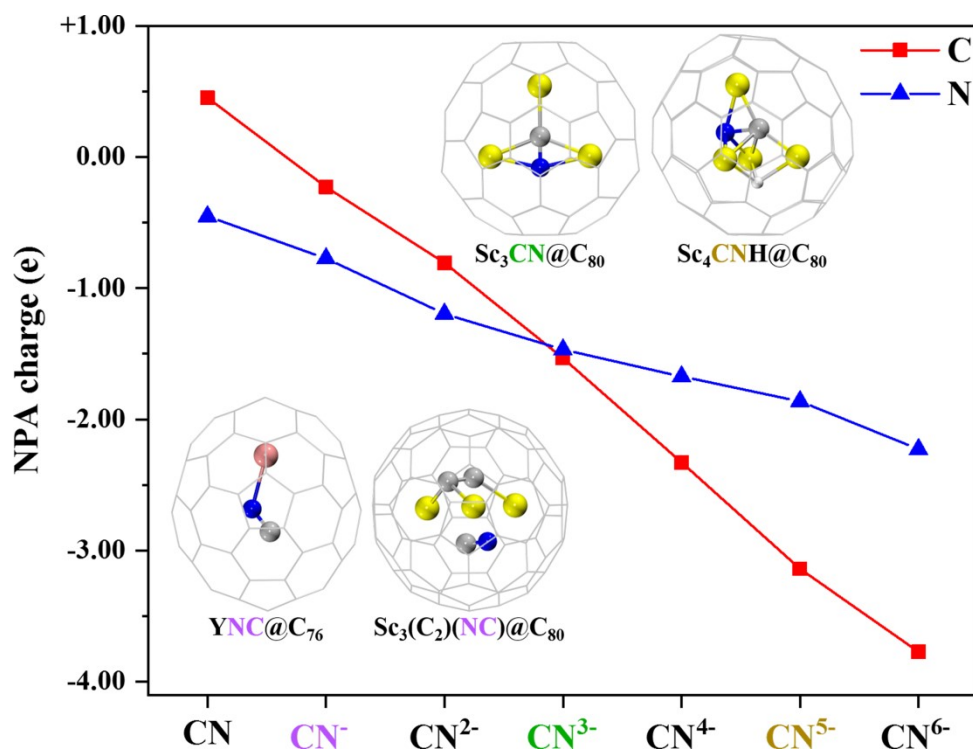

**Fig. S3** NPA charges of the atoms in  $\text{CN}^q$  ( $q = 0-6$ ) at the M06-2X/6-31++G\* level of theory and the corresponding representative clusterfullerenes.

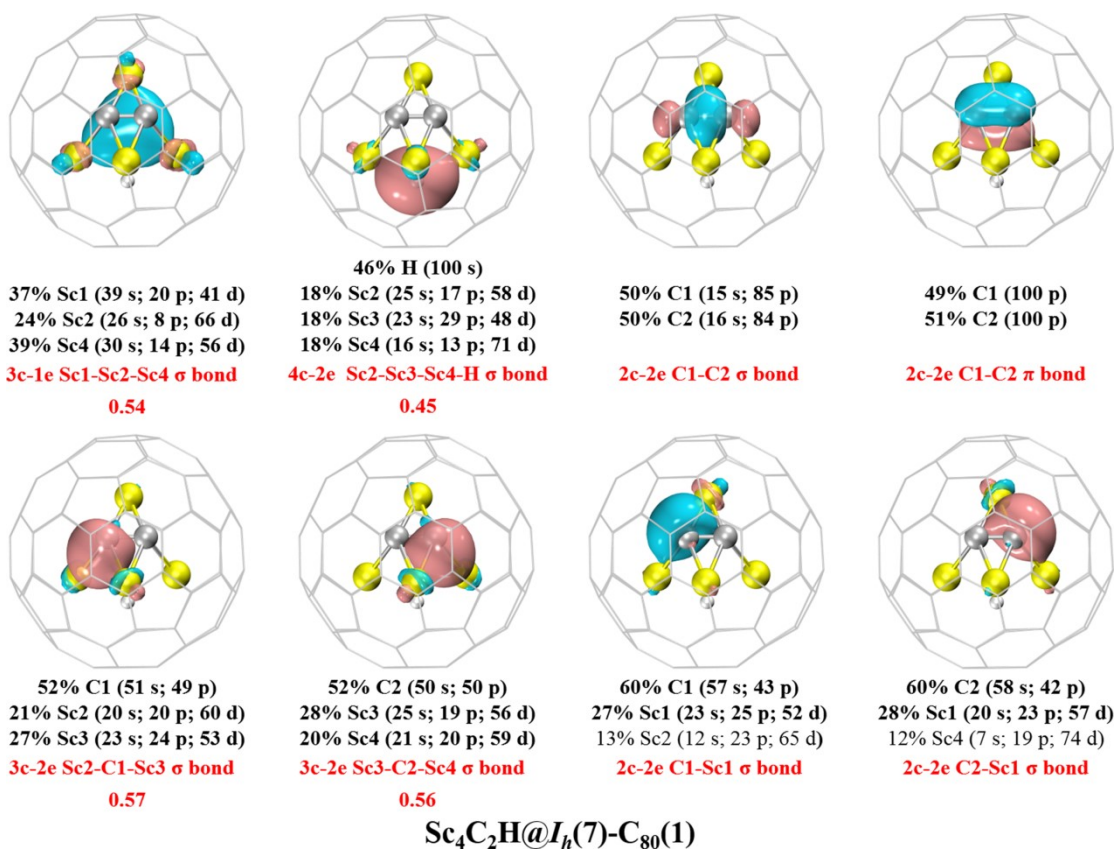

**Fig. S4** LMOs (isovalue:  $\pm 0.06$  au) of Sc<sub>4</sub>C<sub>2</sub>H@I<sub>h</sub>-C<sub>80</sub>(1) with atomic orbital compositions (%) at the B3LYP/6-31G\*~SDD level of theory. The atoms mainly contributing to the orbital are highlighted in bold. The normalized multicenter bond order values are given in red.

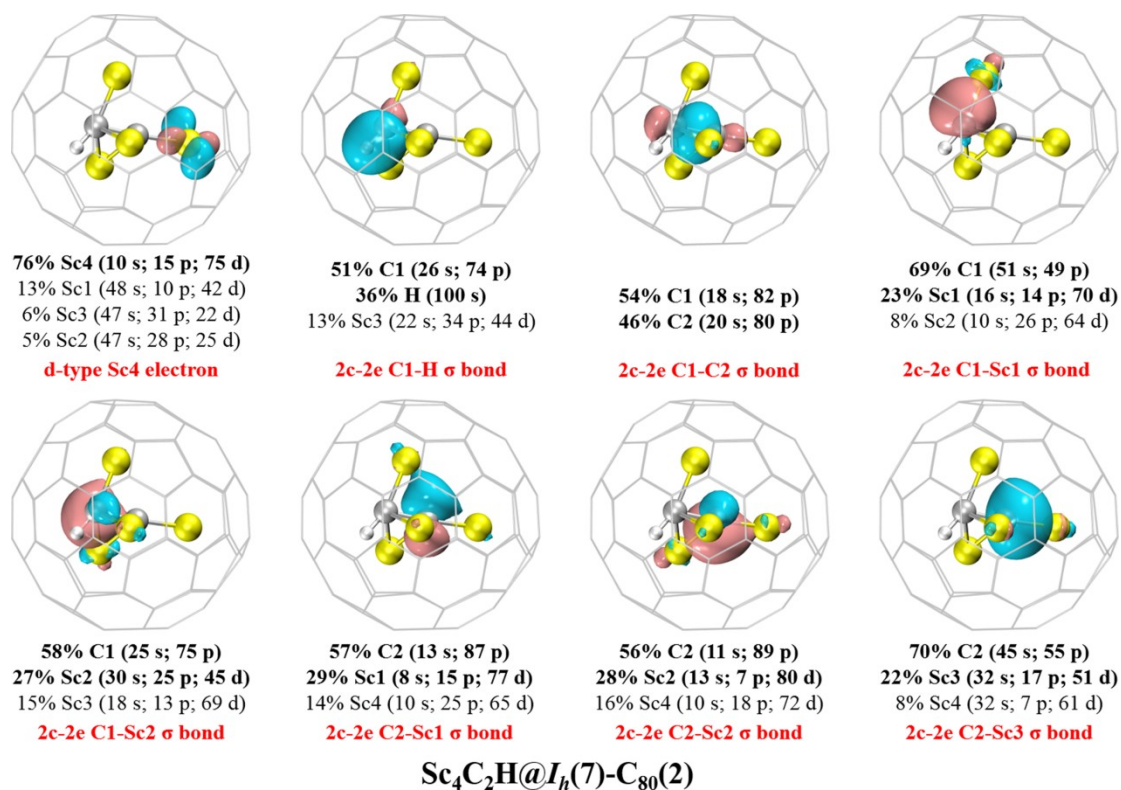

**Fig. S5** LMOs (isovalue:  $\pm 0.06$  au) of Sc<sub>4</sub>C<sub>2</sub>H@I<sub>h</sub>-C<sub>80</sub>(2) with atomic orbital compositions (%) at the B3LYP/6-31G\*~SDD level of theory.

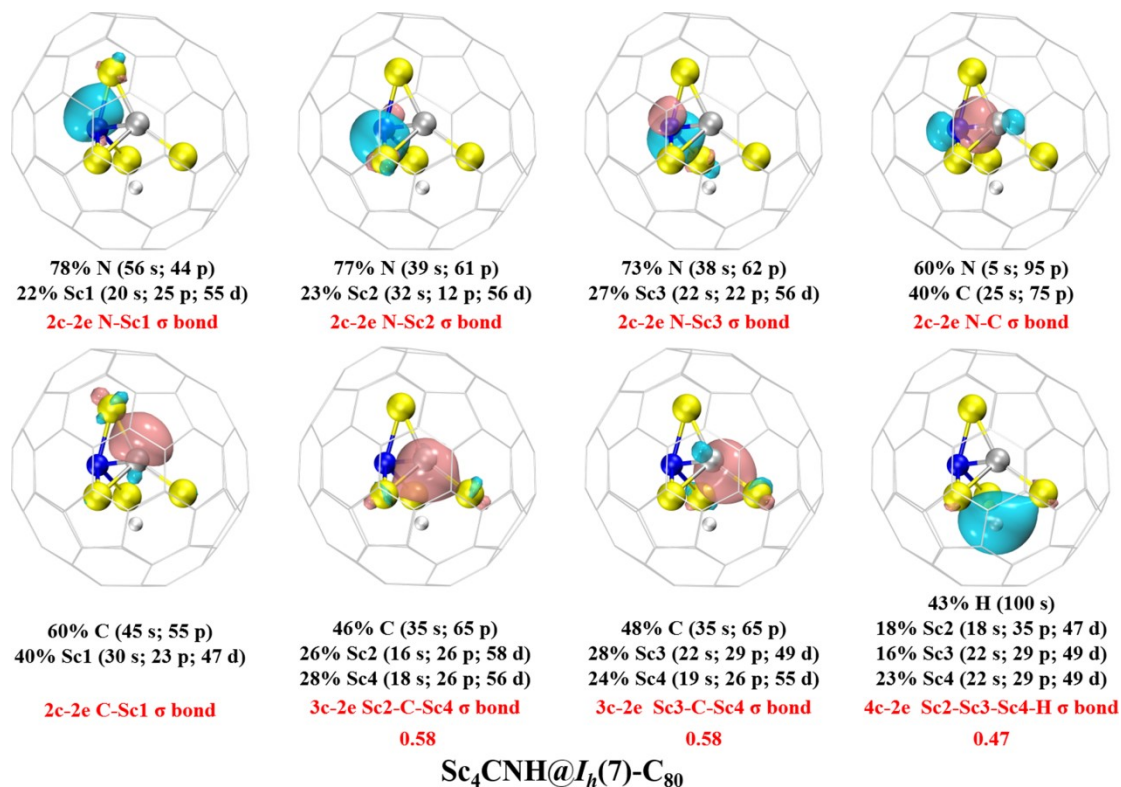

**Fig. S6** LMOs (isovalue:  $\pm 0.06$  au) of  $\text{Sc}_4\text{CNH}@I_h\text{-C}_{80}$  with atomic orbital compositions (%).

**Table S4** Interatomic distances ( $d$ , Å), Wiberg bond orders (WBOs) and density descriptors (unit: au) at the intracuster (purple) and cluster-cage (green) BCPs of two  $\text{Sc}_4\text{C}_2\text{H}@I_h(7)\text{-C}_{80}$  isomers. Please see Fig. 8 in the main text for the atom numbering.

| compound                                                | A-B     | $d$  | WBO  | $\rho$ | $\nabla^2\rho$ | $H$   | $H/\rho$ | $ V /G$ | $G/\rho$ | $\delta(\text{A,B})$ |
|---------------------------------------------------------|---------|------|------|--------|----------------|-------|----------|---------|----------|----------------------|
|                                                         | Sc1-C1  | 2.12 | 0.76 | 0.08   | 0.30           | -0.02 | -0.20    | 1.18    | 1.12     | 0.83                 |
|                                                         | Sc1-C2  | 2.10 | 0.78 | 0.09   | 0.27           | -0.02 | -0.24    | 1.23    | 1.04     | 0.84                 |
|                                                         | Sc2-C1  | 2.12 | 0.81 | 0.08   | 0.24           | -0.02 | -0.22    | 1.22    | 1.01     | 0.81                 |
|                                                         | Sc2-H   | 2.03 | 0.30 | 0.04   | 0.10           | -0.01 | -0.17    | 1.22    | 0.73     | 0.32                 |
|                                                         | Sc3-C1  | 2.14 | 0.74 | 0.08   | 0.28           | -0.02 | -0.20    | 1.19    | 1.09     | 0.77                 |
|                                                         | Sc3-C2  | 2.12 | 0.77 | 0.08   | 0.26           | -0.02 | -0.24    | 1.24    | 1.01     | 0.81                 |
|                                                         | Sc3-H   | 2.09 | 0.27 | 0.04   | 0.11           | -0.01 | -0.13    | 1.16    | 0.80     | 0.27                 |
|                                                         | Sc4-C2  | 2.13 | 0.77 | 0.07   | 0.23           | -0.02 | -0.21    | 1.21    | 1.00     | 0.77                 |
|                                                         | Sc4-H   | 2.03 | 0.30 | 0.04   | 0.10           | -0.01 | -0.17    | 1.23    | 0.73     | 0.32                 |
|                                                         | C1-C2   | 1.34 | 1.42 | 0.33   | -0.82          | -0.38 | -1.14    | 3.19    | 0.52     | 0.91                 |
|                                                         | C1-H    | 2.48 | 0.00 | 0.03   | 0.06           | 0.00  | -0.09    | 1.16    | 0.58     | 0.00                 |
|                                                         | C2-H    | 2.48 | 0.00 | 0.03   | 0.06           | 0.00  | -0.08    | 1.13    | 0.59     | 0.00                 |
|                                                         | Sc1-C3  | 2.20 | 0.52 | 0.07   | 0.24           | -0.01 | -0.18    | 1.17    | 1.08     | 0.72                 |
|                                                         | Sc2-C8  | 2.24 | 0.51 | 0.06   | 0.21           | -0.01 | -0.18    | 1.18    | 1.01     | 0.71                 |
|                                                         | Sc3-C9  | 2.21 | 0.51 | 0.06   | 0.24           | -0.01 | -0.17    | 1.16    | 1.08     | 0.71                 |
| $\text{Sc}_4\text{C}_2\text{H}@I_h(7)\text{-C}_{80}(1)$ | Sc3-C13 | 2.25 | 0.47 | 0.06   | 0.24           | -0.01 | -0.13    | 1.12    | 1.11     | 0.68                 |
|                                                         | Sc4-C16 | 2.24 | 0.50 | 0.06   | 0.21           | -0.01 | -0.17    | 1.17    | 1.02     | 0.70                 |
|                                                         | C1-C4   | 3.08 | 0.01 | 0.01   | 0.03           | 0.00  | 0.08     | 0.87    | 0.65     | 0.01                 |
|                                                         | C1-C5   | 3.05 | 0.01 | 0.01   | 0.04           | 0.00  | 0.12     | 0.84    | 0.70     | 0.02                 |
|                                                         | C1-C6   | 3.09 | 0.01 | 0.01   | 0.03           | 0.00  | 0.09     | 0.87    | 0.68     | 0.01                 |
|                                                         | C1-C7   | 3.17 | 0.00 | 0.01   | 0.03           | 0.00  | 0.09     | 0.86    | 0.66     | 0.01                 |
|                                                         | C2-C17  | 3.14 | 0.01 | 0.01   | 0.04           | 0.00  | 0.11     | 0.85    | 0.75     | 0.01                 |
|                                                         | C2-C18  | 3.16 | 0.01 | 0.01   | 0.03           | 0.00  | 0.09     | 0.86    | 0.68     | 0.01                 |
|                                                         | C2-C19  | 3.06 | 0.01 | 0.01   | 0.04           | 0.00  | 0.10     | 0.86    | 0.69     | 0.01                 |
|                                                         | C2-C20  | 3.10 | 0.01 | 0.01   | 0.03           | 0.00  | 0.08     | 0.88    | 0.67     | 0.02                 |
|                                                         | C2-C21  | 3.03 | 0.01 | 0.01   | 0.04           | 0.00  | 0.11     | 0.84    | 0.73     | 0.01                 |
|                                                         | H-C10   | 2.56 | 0.00 | 0.02   | 0.05           | 0.00  | 0.08     | 0.88    | 0.73     | 0.01                 |
|                                                         | H-C11   | 2.63 | 0.00 | 0.01   | 0.04           | 0.00  | 0.06     | 0.91    | 0.66     | 0.00                 |
|                                                         | H-C12   | 2.52 | 0.00 | 0.02   | 0.05           | 0.00  | 0.10     | 0.87    | 0.77     | 0.01                 |
|                                                         | H-C14   | 2.56 | 0.00 | 0.01   | 0.05           | 0.00  | 0.09     | 0.88    | 0.75     | 0.01                 |
|                                                         | H-C15   | 2.62 | 0.01 | 0.02   | 0.05           | 0.00  | 0.08     | 0.88    | 0.72     | 0.01                 |
|                                                         | Sc1-C1  | 2.04 | 0.99 | 0.10   | 0.23           | -0.03 | -0.32    | 1.35    | 0.92     | 1.01                 |
|                                                         | Sc1-C2  | 2.21 | 0.65 | 0.06   | 0.21           | -0.01 | -0.17    | 1.17    | 1.01     | 0.60                 |
| $\text{Sc}_4\text{C}_2\text{H}@I_h(7)\text{-C}_{80}(2)$ | Sc2-C1  | 2.17 | 0.75 | 0.07   | 0.22           | -0.02 | -0.23    | 1.24    | 0.98     | 0.76                 |
|                                                         | Sc2-C2  | 2.11 | 0.77 | 0.08   | 0.24           | -0.02 | -0.26    | 1.26    | 1.00     | 0.71                 |
|                                                         | Sc3-C1  | 2.19 | 0.73 | 0.07   | 0.23           | -0.01 | -0.20    | 1.19    | 1.02     | 0.76                 |

|         |      |      |      |       |       |       |      |      |      |
|---------|------|------|------|-------|-------|-------|------|------|------|
| Sc3-C2  | 2.10 | 0.77 | 0.08 | 0.25  | -0.02 | -0.24 | 1.23 | 1.05 | 0.77 |
| Sc4-C2  | 1.97 | 1.07 | 0.10 | 0.34  | -0.03 | -0.31 | 1.27 | 1.13 | 0.96 |
| C1-C2   | 1.49 | 0.79 | 0.24 | -0.42 | -0.21 | -0.85 | 3.01 | 0.42 | 0.48 |
| C1-H    | 1.09 | 0.57 | 0.26 | -0.78 | -0.25 | -0.97 | 5.39 | 0.22 | 0.52 |
| Sc1-C3  | 2.25 | 0.50 | 0.06 | 0.21  | -0.01 | -0.17 | 1.17 | 1.02 | 0.70 |
| Sc2-C7  | 2.26 | 0.47 | 0.06 | 0.22  | -0.01 | -0.15 | 1.15 | 1.05 | 0.68 |
| Sc2-C8  | 2.23 | 0.50 | 0.06 | 0.23  | -0.01 | -0.17 | 1.16 | 1.07 | 0.70 |
| Sc3-C9  | 2.23 | 0.51 | 0.06 | 0.22  | -0.01 | -0.18 | 1.18 | 1.04 | 0.71 |
| Sc4-C10 | 2.20 | 0.53 | 0.07 | 0.23  | -0.01 | -0.21 | 1.20 | 1.04 | 0.73 |
| C1-C4   | 3.16 | 0.01 | 0.01 | 0.04  | 0.00  | 0.06  | 0.91 | 0.68 | 0.01 |
| C1-C5   | 2.95 | 0.01 | 0.01 | 0.05  | 0.00  | 0.11  | 0.85 | 0.76 | 0.02 |
| H-C6    | 2.10 | 0.02 | 0.03 | 0.09  | 0.00  | 0.01  | 1.01 | 0.83 | 0.03 |

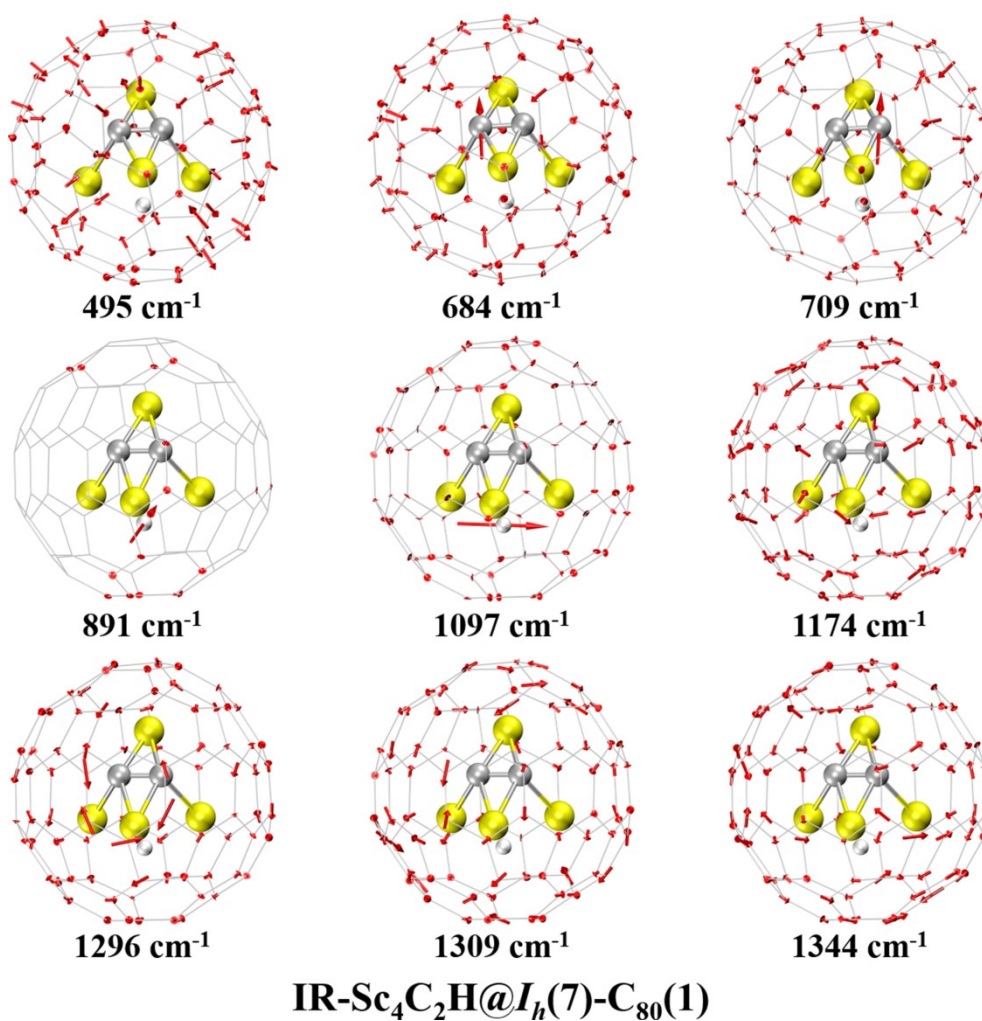

**Fig. S7** Main IR vibrational modes of Sc<sub>4</sub>C<sub>2</sub>H@I<sub>h</sub>(7)-C<sub>80</sub>(1).

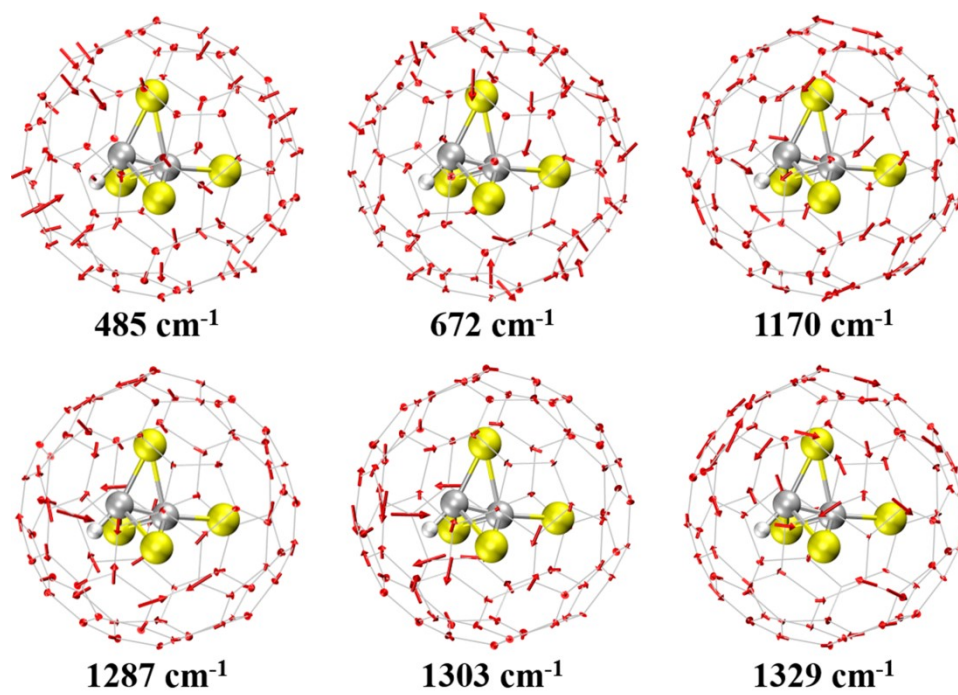

**IR-Sc<sub>4</sub>C<sub>2</sub>H@I<sub>h</sub>(7)-C<sub>80</sub>(2)**

**Fig. S8** Main IR vibrational modes of Sc<sub>4</sub>C<sub>2</sub>H@I<sub>h</sub>(7)-C<sub>80</sub>(2).



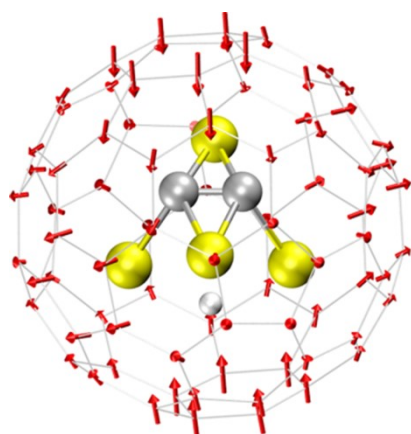

**229 cm<sup>-1</sup>**

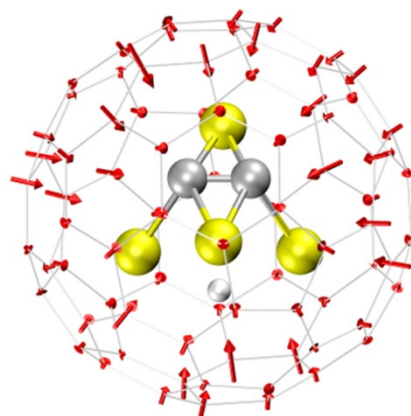

**395 cm<sup>-1</sup>**

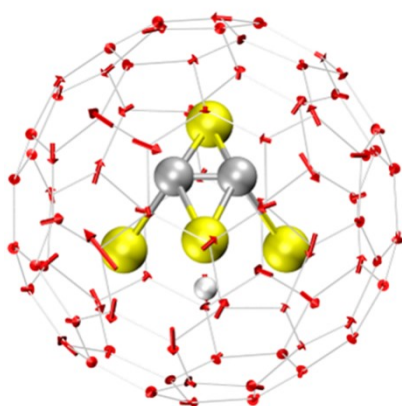

**1229 cm<sup>-1</sup>**

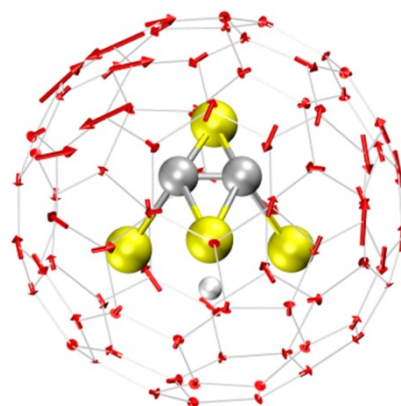

**1498 cm<sup>-1</sup>**

### **Raman-Sc<sub>4</sub>C<sub>2</sub>H@I<sub>h</sub>(7)-C<sub>80</sub>(1)**

**Fig. S9** Main Raman vibrational modes of Sc<sub>4</sub>C<sub>2</sub>H@I<sub>h</sub>(7)-C<sub>80</sub>(1).

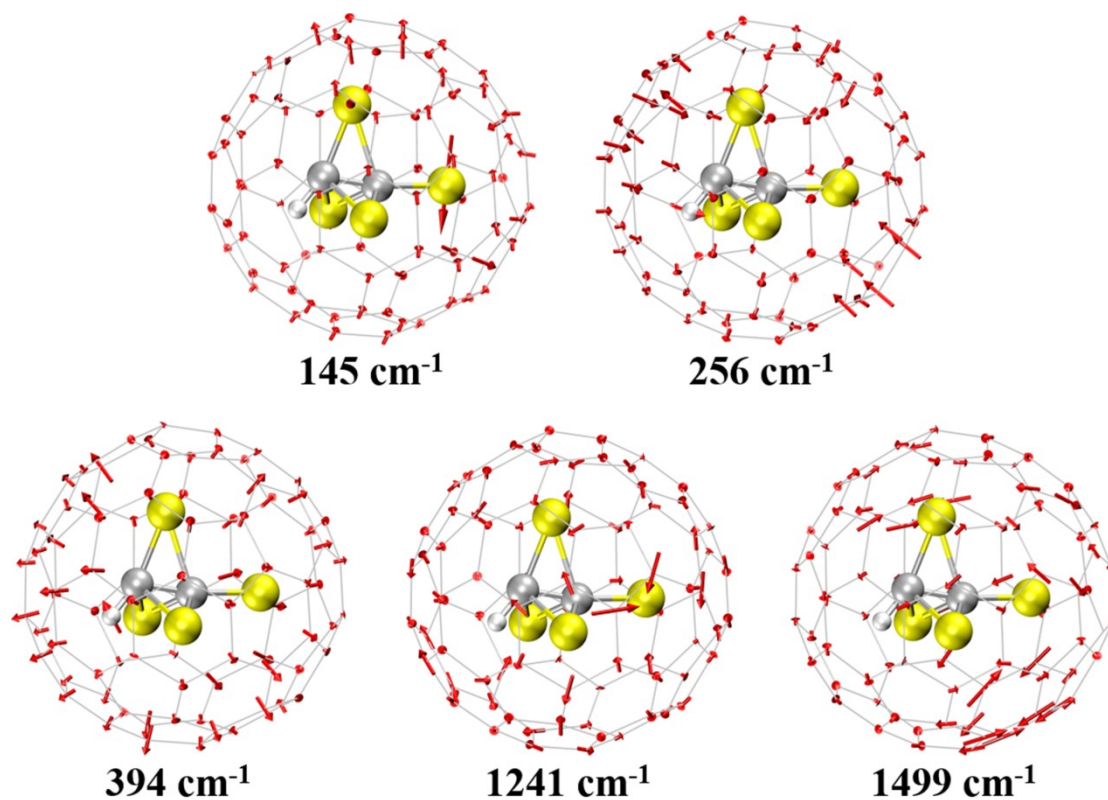

### Raman-Sc<sub>4</sub>C<sub>2</sub>H@I<sub>h</sub>(7)-C<sub>80</sub>(2)

**Fig. S10** Main Raman vibrational modes of Sc<sub>4</sub>C<sub>2</sub>H@I<sub>h</sub>(7)-C<sub>80</sub>(2).

#### Optimized Cartesian Coordinates (M06-2X/6-31G\*~SDD)

##### Sc<sub>3</sub>CH@I<sub>h</sub>(7)-C<sub>80</sub>

|   |             |             |            |
|---|-------------|-------------|------------|
| C | 1.63188500  | 1.72464900  | 3.32961800 |
| C | 1.46477700  | 2.88129600  | 2.49673200 |
| C | 0.07343500  | 3.24005600  | 2.50268600 |
| C | 0.34707400  | 1.36487700  | 3.85266700 |
| C | -0.61261600 | 2.29412700  | 3.34390800 |
| C | 0.00000000  | 0.00000000  | 4.06740000 |
| C | 1.00848100  | -0.98301300 | 3.85266700 |
| C | 2.59903900  | 0.73080100  | 3.03198300 |
| C | 2.29308000  | -0.61652200 | 3.34390800 |
| C | 3.47147700  | 0.95782300  | 1.90490100 |
| C | 2.26018000  | 3.07887300  | 1.34678400 |
| C | 3.28236000  | 2.10379000  | 1.07368700 |
| C | 1.67494600  | 3.72831500  | 0.23103700 |
| C | -0.55060600 | 3.84313900  | 1.36991500 |
| C | 0.28384900  | 4.08550200  | 0.23610300 |
| C | -1.95493800 | 3.57141400  | 1.11652000 |
| C | -1.93241200 | 1.88543300  | 3.03198300 |
| C | -2.56523800 | 2.52747600  | 1.90490100 |
| C | -1.35555500 | -0.38186400 | 3.85266700 |

|   |             |             |             |
|---|-------------|-------------|-------------|
| C | -2.30953200 | 0.55092900  | 3.32961800  |
| C | -1.68046400 | -1.67760500 | 3.34390800  |
| C | 0.67764700  | -2.27557800 | 3.32961800  |
| C | -0.66662700 | -2.61623400 | 3.03198300  |
| C | 2.76925300  | -1.68362400 | 2.50268600  |
| C | 1.76288700  | -2.70918200 | 2.49673200  |
| C | 4.07040400  | -0.09268100 | 1.11652000  |
| C | 3.60355900  | -1.44473100 | 1.36991500  |
| C | 3.72202700  | 1.77711200  | -0.25181400 |
| C | 4.25370000  | 0.42069600  | -0.25242800 |
| C | 2.04038300  | 3.37238700  | -1.10545300 |
| C | 3.01714700  | 2.36684600  | -1.36691300 |
| C | -0.21845300 | 3.95414000  | -1.11535600 |
| C | 0.87742400  | 3.49437300  | -1.93111300 |
| C | -2.49118300 | 3.47346400  | -0.25242800 |
| C | -1.58695500 | 3.61563800  | -1.39292000 |
| C | -3.46311600 | 1.79071200  | 1.07368700  |
| C | -3.40003800 | 2.33481400  | -0.25181400 |
| C | -3.22766400 | -0.17211400 | 2.49673200  |
| C | -2.84268800 | -1.55643200 | 2.50268600  |
| C | -3.79647200 | 0.41793700  | 1.34678400  |
| C | -3.05295300 | -2.39840800 | 1.36991500  |
| C | -0.90623900 | -3.48529900 | 1.90490100  |
| C | -2.11546600 | -3.47873300 | 1.11652000  |
| C | 1.53629200  | -3.49681000 | 1.34678400  |
| C | 0.18075600  | -3.89450200 | 1.07368700  |
| C | 3.39622400  | -2.28857100 | 0.23610300  |
| C | 2.39134300  | -3.31470300 | 0.23103700  |
| C | 3.92471200  | -0.43347600 | -1.39292000 |
| C | 3.53361200  | -1.78788400 | -1.11535600 |
| C | 2.83336400  | 1.55469200  | -2.51108200 |
| C | 3.23836500  | 0.16596900  | -2.49595200 |
| C | 0.66607800  | 2.62664000  | -3.03674500 |
| C | 1.68587400  | 1.68393400  | -3.35146500 |
| C | -1.76291600 | 2.72152200  | -2.49595200 |
| C | -0.67746200 | 2.27343500  | -3.32866000 |
| C | -3.55832200 | 1.42950300  | -1.36691300 |
| C | -2.76308500 | 1.67641900  | -2.51108200 |
| C | -4.06628800 | -0.41361200 | 0.23103700  |
| C | -3.68007300 | -1.79693100 | 0.23610300  |
| C | -3.94076400 | 0.08083000  | -1.10545300 |
| C | -3.31515900 | -2.16625600 | -1.11535600 |
| C | -3.46492800 | -0.98731500 | -1.93111300 |
| C | -1.76251700 | -3.89416000 | -0.25242800 |

|    |             |             |             |
|----|-------------|-------------|-------------|
| C  | -0.32198900 | -4.11192600 | -0.25181400 |
| C  | -2.33775700 | -3.18216200 | -1.39292000 |
| C  | 1.90038100  | -3.45321700 | -1.10545300 |
| C  | 2.58750400  | -2.50705800 | -1.93111300 |
| C  | 0.54117500  | -3.79634900 | -1.36691300 |
| C  | 2.30758400  | -0.55001800 | -3.32866000 |
| C  | 1.35462200  | 0.38245700  | -3.84533100 |
| C  | 1.94169800  | -1.89016000 | -3.03674500 |
| C  | -1.00852800 | 0.98190800  | -3.84533100 |
| C  | -2.30126700 | 0.61804300  | -3.35146500 |
| C  | -2.60777600 | -0.73648000 | -3.03674500 |
| C  | 0.00000000  | 0.00000000  | -4.06437400 |
| C  | -1.47544900 | -2.88749100 | -2.49595200 |
| C  | -0.07027900 | -3.23111100 | -2.51108200 |
| C  | 0.61539300  | -2.30197700 | -3.35146500 |
| C  | -1.63012100 | -1.72341700 | -3.32866000 |
| C  | -0.34609300 | -1.36436500 | -3.84533100 |
| C  | 0.00000000  | 0.00000000  | 0.25052700  |
| Sc | 2.08917300  | 0.00000000  | -0.00359800 |
| Sc | -1.04458600 | 1.80927700  | -0.00359800 |
| Sc | -1.04458600 | -1.80927700 | -0.00359800 |
| H  | 0.00000000  | 0.00000000  | 1.38176000  |

**Sc<sub>4</sub>CNH@I<sub>h</sub>(7)-C<sub>80</sub>**

|   |             |             |             |
|---|-------------|-------------|-------------|
| C | -1.05503300 | -2.83880900 | 2.73608200  |
| C | -3.12228600 | -2.71398600 | -0.34984300 |
| C | -4.04296500 | -0.81882300 | 0.67126300  |
| C | 0.70097500  | -1.64494600 | 3.68604300  |
| C | -2.78884800 | 0.37774900  | 2.90628700  |
| C | -3.86457900 | -1.49487600 | -0.58735500 |
| C | 1.28809800  | -3.32789800 | 1.92281100  |
| C | 0.69828200  | -3.95135600 | 0.79342800  |
| C | -0.99469200 | -3.86144400 | -0.79564500 |
| C | -0.54375000 | 0.48140200  | 4.01609400  |
| C | -2.17425700 | -3.22527000 | -1.30043700 |
| C | -1.63666000 | -1.71923100 | 3.43526100  |
| C | -1.70814200 | 1.12859500  | 3.48903400  |
| C | -3.39909700 | 1.19423600  | 1.89391100  |
| C | -4.01924600 | 0.61883700  | 0.74431800  |
| C | 1.93864700  | -0.94550700 | 3.42487300  |
| C | 1.32517400  | -3.84905000 | -0.48752600 |
| C | 0.28245100  | -3.79555800 | -1.47835400 |
| C | 2.55639100  | -2.68711200 | 1.76972500  |
| C | -3.61062200 | -0.73795000 | -1.76146200 |

|   |             |             |             |
|---|-------------|-------------|-------------|
| C | -1.64532400 | 2.40210600  | 2.83474100  |
| C | 0.69308300  | 1.16627900  | 3.81462400  |
| C | -1.63865300 | -3.37909200 | 1.53803900  |
| C | -2.69783600 | 2.46034600  | 1.85433600  |
| C | -2.05229900 | -2.56742200 | -2.58091700 |
| C | 2.87182300  | -1.50388500 | 2.51005800  |
| C | -3.96948700 | 1.41908100  | -0.46799700 |
| C | 1.91834900  | 0.46462900  | 3.53652300  |
| C | -2.71743800 | -1.29365800 | -2.74192800 |
| C | -3.67152700 | 0.70645900  | -1.68600900 |
| C | 0.43378200  | -3.07791900 | -2.70254600 |
| C | -0.76749600 | -2.49772300 | -3.28280700 |
| C | 0.76804600  | 2.44682000  | 3.17454100  |
| C | -2.85253200 | -2.79858600 | 1.05628400  |
| C | -0.39781000 | 3.06288600  | 2.64010500  |
| C | 3.71847900  | -0.66205700 | 1.69484000  |
| C | 2.75511700  | 1.30530900  | 2.72604900  |
| C | -1.86950700 | -0.44896500 | -3.53412600 |
| C | 3.92499300  | -1.34000100 | 0.43241600  |
| C | -2.82539600 | 1.53805400  | -2.49933200 |
| C | 2.02781300  | 2.52792900  | 2.50253900  |
| C | 2.72198000  | -2.41753700 | -1.87302200 |
| C | -0.67424400 | -1.17027100 | -3.85181700 |
| C | 1.67656200  | -2.37655900 | -2.85659800 |
| C | -3.41541700 | -1.63119600 | 1.68906800  |
| C | 3.69972300  | 0.77096800  | 1.78639300  |
| C | -2.57529200 | 2.77488400  | -1.80560300 |
| C | -0.25303500 | 3.82604000  | 1.45712800  |
| C | -1.30873300 | 3.87449500  | 0.47294700  |
| C | -1.88464200 | 0.97744100  | -3.42817200 |
| C | 4.11469100  | -0.59660900 | -0.78646800 |
| C | 3.44763000  | -1.17133900 | -1.92398400 |
| C | 1.74681600  | -1.09984000 | -3.51388100 |
| C | 2.16620100  | 3.22478400  | 1.27647700  |
| C | 0.56915300  | -0.45322700 | -3.97648600 |
| C | -2.77070200 | -1.04891900 | 2.82676100  |
| C | 1.01089600  | 3.89968300  | 0.78309000  |
| C | -0.66735500 | 3.97587700  | -0.81679200 |
| C | -1.25805900 | 3.37421000  | -1.96135000 |
| C | 4.00583100  | 1.55954500  | 0.58871000  |
| C | 2.82759200  | -0.35992900 | -2.94385900 |
| C | -0.68383700 | 1.67326100  | -3.68506000 |
| C | 4.22062900  | 0.87715100  | -0.71261200 |
| C | 3.14935600  | 2.71735600  | 0.33931100  |

|    |             |             |             |
|----|-------------|-------------|-------------|
| C  | 0.75300000  | 3.99009600  | -0.62024000 |
| C  | 0.53705800  | 0.96166600  | -3.93601900 |
| C  | 0.37677700  | -2.79650600 | 2.89846100  |
| C  | -0.36107900 | 2.85770800  | -2.94124500 |
| C  | 2.77058600  | 1.05480100  | -2.82557200 |
| C  | 3.47000400  | 1.65075600  | -1.70375600 |
| C  | 2.84878100  | 2.77901900  | -1.06126700 |
| C  | 1.63542500  | 3.38986600  | -1.55608500 |
| C  | 1.62017300  | 1.70499400  | -3.35561500 |
| C  | 1.06137500  | 2.87277700  | -2.74146100 |
| C  | -3.29716300 | 2.74161100  | -0.53192600 |
| C  | 3.19038200  | -2.58886400 | 0.49026400  |
| C  | -2.59051700 | 3.24472900  | 0.65119000  |
| C  | -0.53304000 | -0.96471700 | 4.03729200  |
| C  | 2.55234500  | -3.13401200 | -0.65927200 |
| C  | 0.13530000  | 0.42962900  | -0.12406500 |
| C  | -0.73099900 | -3.95759800 | 0.60723200  |
| Sc | 2.16135000  | 0.49777600  | -0.06007700 |
| Sc | -0.51938300 | -1.29360300 | -1.35104800 |
| Sc | -1.67524500 | 1.28034800  | -0.22500900 |
| Sc | -0.45123000 | -0.60304200 | 1.77878100  |
| N  | 0.72392300  | -0.87916600 | 0.18189000  |
| H  | -1.73384700 | -0.69183700 | 0.17095400  |

**Sc<sub>4</sub>C<sub>2</sub>H@I<sub>h</sub>(7)-C<sub>80</sub>(1)**

|   |             |             |             |
|---|-------------|-------------|-------------|
| C | 0.26158000  | -1.72695000 | -3.69084700 |
| C | -1.97588200 | -1.12825600 | -3.41623300 |
| C | 1.45721700  | -2.21523700 | -3.09192400 |
| C | -3.12819200 | -1.00478000 | -2.57399700 |
| C | -3.23219400 | -2.01122000 | -1.54768000 |
| C | 0.12380800  | -0.34835600 | -4.06219000 |
| C | -1.24928900 | 0.02253200  | -3.90309900 |
| C | -1.02898000 | -2.21329300 | -3.30101900 |
| C | -1.14867800 | -3.19322800 | -2.28237800 |
| C | 0.05198000  | -3.73070000 | -1.73040900 |
| C | -2.27989900 | -3.08297200 | -1.42023200 |
| C | 1.34120900  | -3.26153200 | -2.13977400 |
| C | 2.55202700  | -1.29073900 | -2.92598500 |
| C | -3.63134400 | 0.33710400  | -2.26117500 |
| C | -3.71048000 | -1.68071500 | -0.22384000 |
| C | 1.16941600  | 0.58530900  | -3.83454400 |
| C | -1.61458300 | 1.33388400  | -3.50366500 |
| C | 0.13454800  | -4.07496200 | -0.33598700 |
| C | -2.17876600 | -3.43176800 | -0.03203400 |

|   |             |             |             |
|---|-------------|-------------|-------------|
| C | 4.24512400  | 0.37658000  | -0.16851800 |
| C | 4.03730500  | -0.62952500 | 0.84775300  |
| C | 3.58473200  | -1.97030700 | 0.51723800  |
| C | 3.09674800  | 0.98550600  | 2.52563200  |
| C | 3.51637500  | -0.32760400 | 2.16842800  |
| C | 2.83388200  | -2.48005200 | 1.63262000  |
| C | 1.64705500  | -1.32404800 | 3.47665900  |
| C | 2.79878900  | -1.47136900 | 2.64968800  |
| C | -1.17202400 | -0.57300800 | 3.85256000  |
| C | -2.41170200 | -0.07974300 | 3.35002900  |
| C | -3.20517700 | -0.87121700 | 2.44614000  |
| C | -3.85078100 | 0.01803800  | 1.51007600  |
| C | -2.55900700 | 1.29705000  | 2.98084300  |
| C | -3.45016400 | 1.35829400  | 1.85114200  |
| C | -1.45906500 | 2.20604100  | 3.11628700  |
| C | 3.77225000  | 1.68979600  | 0.21143700  |
| C | 4.02971500  | -0.02474100 | -1.56771600 |
| C | 3.24827700  | 1.98974000  | 1.52426800  |
| C | 3.10613900  | 2.57902100  | -0.72034400 |
| C | 3.26625100  | 0.86965500  | -2.44979300 |
| C | 3.52882900  | -1.38003100 | -1.86425300 |
| C | 2.79993200  | 2.17959600  | -2.05414200 |
| C | 2.40479200  | 0.08337800  | -3.28687400 |
| C | 1.61590400  | 2.70868800  | -2.64673400 |
| C | 3.28488400  | -2.35844800 | -0.82513800 |
| C | 2.23190200  | -3.31159100 | -1.01262000 |
| C | 0.81054000  | 1.92146100  | -3.53899600 |
| C | 2.30051800  | 3.06431200  | 1.40428800  |
| C | 2.21737900  | 3.42482500  | 0.00966900  |
| C | 1.00238900  | 3.90373500  | -0.56102500 |
| C | 0.72829200  | 3.56717200  | -1.91068600 |
| C | 1.48454400  | -3.81049500 | 0.10288800  |
| C | 1.99510200  | 1.12396800  | 3.42240900  |
| C | 1.74785100  | -3.38614400 | 1.43368800  |
| C | 0.58421500  | -2.28118700 | 3.32083800  |
| C | 1.27683500  | -0.02045900 | 3.89819400  |
| C | -1.42912800 | 3.77347200  | -0.11251400 |
| C | -0.61882200 | 3.31274400  | -2.35899300 |
| C | -1.70322500 | 3.36351300  | -1.45636300 |
| C | -0.10902500 | 4.09524100  | 0.34137300  |
| C | -0.56856400 | 2.29416500  | -3.36802600 |
| C | -2.17621400 | 3.25787700  | 0.99779500  |
| C | -2.80039900 | 2.45078900  | -1.63590200 |
| C | -0.02763200 | 3.82319500  | 1.77130500  |

|    |             |             |             |
|----|-------------|-------------|-------------|
| C  | 1.19311100  | 3.23333900  | 2.30477700  |
| C  | 0.64063700  | -3.35305700 | 2.36255400  |
| C  | -0.79461400 | -1.91914300 | 3.50985800  |
| C  | -0.72238800 | -3.67426200 | 1.95279000  |
| C  | -1.60790200 | -2.75943700 | 2.67360200  |
| C  | -2.77530000 | -2.17134400 | 2.05212200  |
| C  | -0.10630000 | 0.34161400  | 4.07088200  |
| C  | -0.24974700 | 1.71382700  | 3.69064700  |
| C  | -3.04842600 | -2.55445600 | 0.70738900  |
| C  | -4.13044300 | -0.36049300 | 0.15076400  |
| C  | -0.98093100 | -3.96679700 | 0.54998900  |
| C  | 1.05322300  | 2.20683800  | 3.29092000  |
| C  | -3.23907600 | 2.30596900  | 0.81784000  |
| C  | -1.32949100 | 3.28211800  | 2.16309300  |
| C  | -3.58776000 | 1.95165400  | -0.53663200 |
| C  | -4.12833500 | 0.65296200  | -0.89887400 |
| C  | -2.80355000 | 1.46521400  | -2.67790700 |
| Sc | -0.03242100 | 1.73772500  | 0.94617300  |
| C  | 0.11235800  | 0.64718500  | -0.87914800 |
| Sc | 2.05895900  | -0.08938100 | -0.58299000 |
| Sc | -1.93862100 | 0.12985300  | -0.84996100 |
| C  | 0.03806900  | -0.68718600 | -0.82897500 |
| Sc | -0.34326700 | -1.68602900 | 0.99799600  |
| H  | -1.25117000 | 0.12515400  | 1.12469500  |

**Sc<sub>4</sub>C<sub>2</sub>H@I<sub>h</sub>(7)-C<sub>80</sub>(2)**

|   |             |             |             |
|---|-------------|-------------|-------------|
| C | -2.76533800 | 3.18732700  | 0.41559500  |
| C | -1.75195600 | 2.12725300  | -2.99399900 |
| C | 0.22390500  | 3.24161600  | -2.47623500 |
| C | -2.05425900 | 2.44543700  | 2.49834700  |
| C | 0.87768400  | 4.02487400  | 0.13127800  |
| C | -0.36736100 | 2.26968700  | -3.34047600 |
| C | -3.77420100 | 1.02935800  | 1.35312200  |
| C | -4.13507200 | 0.65045700  | 0.03040700  |
| C | -3.47159000 | 0.59169500  | -2.19411900 |
| C | 0.28871100  | 3.26046900  | 2.41163500  |
| C | -2.43975800 | 0.88999300  | -3.12343900 |
| C | -1.53605800 | 3.93597600  | 0.75781000  |
| C | 1.27738600  | 3.63386100  | 1.46179200  |
| C | 1.92002500  | 3.57258600  | -0.76326700 |
| C | 1.58917700  | 3.12955000  | -2.07512600 |
| C | -1.70726400 | 1.38242500  | 3.39603300  |
| C | -4.08849600 | -0.72772000 | -0.38321900 |
| C | -3.68426400 | -0.76364300 | -1.76424800 |



|   |             |             |             |
|---|-------------|-------------|-------------|
| C | -3.46133100 | -0.01127000 | 2.28906300  |
| C | 0.38638400  | 1.17321500  | -3.83089700 |
| C | 2.54865400  | 2.97983200  | 1.38746400  |
| C | 0.62396900  | 2.23954700  | 3.34141700  |
| C | -3.01562100 | 2.69602000  | -0.92255500 |
| C | 2.94482100  | 2.91663700  | 0.00236900  |
| C | -1.70553300 | -0.20680800 | -3.70291200 |
| C | -2.43779800 | 0.17108000  | 3.28684200  |
| C | 2.36438900  | 2.07219800  | -2.62390700 |
| C | -0.35841700 | 1.31949600  | 3.82798500  |
| C | -0.31129000 | -0.06141500 | -4.02929700 |
| C | 1.76377700  | 1.10723900  | -3.49061600 |
| C | -2.89923600 | -1.84128500 | -2.28950000 |
| C | -1.96200500 | -1.58507200 | -3.37456600 |
| C | 1.88224100  | 1.55623800  | 3.25351500  |
| C | -2.03020500 | 3.02354700  | -1.90898400 |
| C | 2.83287800  | 1.87334400  | 2.24080000  |
| C | -1.79426700 | -1.09625600 | 3.53049600  |
| C | 0.27994600  | 0.05379400  | 4.05883200  |
| C | 0.32830500  | -1.33784900 | -3.89239800 |
| C | -2.40314100 | -2.06198200 | 2.64161300  |
| C | 2.40257900  | -0.15274000 | -3.27084100 |
| C | 1.67039400  | 0.21340200  | 3.69526800  |
| C | -2.96075300 | -2.86145000 | 0.00192900  |
| C | -0.68811200 | -2.31089100 | -3.49776800 |
| C | -2.55865500 | -2.88773100 | -1.37679400 |
| C | -0.80396300 | 3.73761200  | -1.58920400 |
| C | -0.41718700 | -1.19263300 | 3.94907900  |
| C | 3.43975600  | 0.03183600  | -2.28011800 |
| C | 3.66121700  | 0.80706200  | 1.72677400  |
| C | 4.23190400  | 0.78389400  | 0.38391800  |
| C | 1.69080800  | -1.37949800 | -3.41591100 |
| C | -1.63870900 | -3.15527800 | 2.11553700  |
| C | -1.94688900 | -3.52964600 | 0.76806100  |
| C | -1.29512600 | -3.58595200 | -1.47273900 |
| C | 2.38136200  | -0.86172700 | 3.12623000  |
| C | -0.31764600 | -3.29301400 | -2.48847900 |
| C | -0.50187700 | 4.18179200  | -0.25474200 |
| C | 3.37868200  | -0.54094300 | 2.13712200  |
| C | 4.24932500  | -0.63917300 | -0.04335300 |
| C | 3.79964300  | -1.04179300 | -1.37765500 |
| C | 0.34734100  | -2.35952500 | 3.52330500  |
| C | -0.92178600 | -3.97030500 | -0.14276100 |
| C | 2.08044400  | -2.46083200 | -2.56873300 |

|    |             |             |             |
|----|-------------|-------------|-------------|
| C  | -0.26555100 | -3.32518800 | 2.59294200  |
| C  | 1.71401300  | -2.13285900 | 3.05619300  |
| C  | 3.70447100  | -1.42093300 | 1.05542300  |
| C  | 1.05239700  | -3.34744900 | -2.06816600 |
| C  | -3.07069600 | 2.28784000  | 1.50362400  |
| C  | 3.07175200  | -2.27948300 | -1.54978700 |
| C  | 0.44237000  | -4.00019400 | 0.24668200  |
| C  | 0.74373300  | -3.66653600 | 1.61494100  |
| C  | 1.95341900  | -2.94850500 | 1.90300600  |
| C  | 2.92235500  | -2.62046300 | 0.88654200  |
| C  | 1.43006100  | -3.73294000 | -0.73772400 |
| C  | 2.67462100  | -3.08779300 | -0.42618900 |
| C  | 3.41558200  | 1.41817700  | -1.87203400 |
| C  | -3.43372200 | -1.39150600 | 1.88369700  |
| C  | 3.75462600  | 1.84171100  | -0.52829500 |
| C  | -1.10015100 | 3.41492300  | 2.04009600  |
| C  | -3.69925300 | -1.75802800 | 0.52736200  |
| C  | -1.22234700 | -0.22751300 | 0.10212800  |
| C  | 0.22543500  | 0.11518000  | 0.06848900  |
| C  | -3.74057500 | 1.46854000  | -1.09027000 |
| Sc | -0.08166400 | -1.30109100 | 1.60446200  |
| Sc | -0.55249000 | -1.08158900 | -1.62075300 |
| Sc | 2.18522700  | 0.16812200  | -0.12388700 |
| Sc | -0.84383700 | 1.92507300  | 0.09740100  |
| H  | -1.85043800 | 0.07377700  | 0.93766600  |
